# Supplementary material
Source: publisher figshare collection journal article supplement (https://frontiersin.figshare.com/ndownloader/files/34023899)
Supplement: Supplementary file [file 34023899]

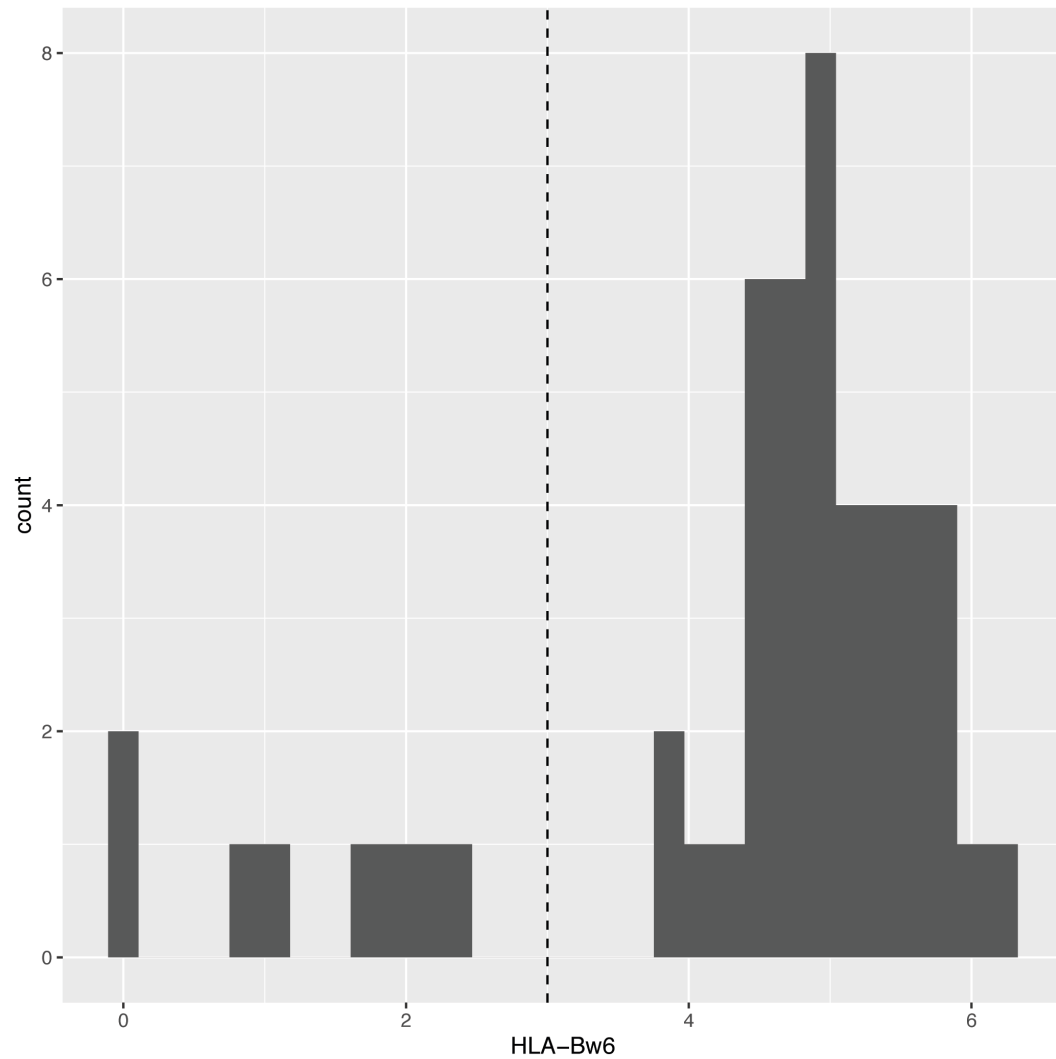

Supplemental figure 14. **Cutoff used to define HLA-Bw6 hi/low.** A histogram shows the distribution of mean Bw6 expression on CD4 T-cells at entry. The dashed line represents the cutoff used to define Bw6 hi vs. low.
